# Supplementary material for: Spontaneous neural synchrony links intrinsic spinal sensory and motor networks during unconsciousness
Source: eLife. 2021 May 27;10:e66308. doi: 10.7554/eLife.66308 (PMC8177891; doi:10.7554/eLife.66308)
Supplement: Figure 8—source data 1. [file elife-66308-fig8-data1.xlsx]

## Sheet: URE_SYN
Avg. num units per region per rat																					Avg. percent most connected nodes per region per rat
Rat number	sDH	dDH	IZ	VH
1	4.1429	30.143	17.857	17.286																	26.807	36.489	18.977	17.727
2	5.625	38.625	23.75	20						Synthetic urethane data											24.299	37.453	19.322	18.926
3	7.5714	38.714	22.429	13																	22.804	38.185	21.25	17.761
4	0	6	13	10																	17.138	38.022	25.963	18.877
5	0	9	11.5	13																	27.566	37.236	17.82	17.378
6	1.5833	18.083	12.667	15.75																	25.976	38.027	17.734	18.264
7	12.565	25.217	16.696	17.565			Tables below organized as: rat number by connection														24.055	38.042	19.182	18.721
8	22.833	28.833	22.5	14.667																	23.693	35.283	22.397	18.628
9	27	36.667	22.333	13.333			Connections are ordered:														25.528	37.258	19.963	17.251
10	11.25	23	12.75	10.5			sDH-sDH	sDH-dDH	sDH-IG	sDH-VH	dDH-dDH	dDH-IG	dDH-VH	IG-IG	IG-VH	VH-VH	within	between			22.813	37.951	19.446	19.79
11	13.125	20.875	6.25	5.625																	24.674	37.906	18.104	19.316
12	5.5789	15.684	5.0526	5.6316																	24.642	37.803	18.724	18.831
13	4.6471	10.588	6.7647	6																	24.973	37.393	17.907	19.726
							Avg. percent excitatory connections per region per rat
							6.9395	20.41	9.7155	9.1568	13.175	14.276	11.777	3.5904	7.6668	3.2933
							5.8504	19.832	9.0887	9.4836	13.745	14.077	13.692	3.5656	7.3647	3.301
							5.6387	19.266	9.7803	8.8934	13.538	15.581	13.93	3.5341	6.7756	3.0624
							2.3611	16.227	8.8258	6.9444	11.921	25.359	17.437	2.5758	7.0996	1.25
							5.399	24.943	6.5267	12.582	12.232	14.453	12.045	3.8271	5.2206	2.7716
							6.1507	18.646	10.959	10.642	13.38	14.215	14.52	2.4911	5.7703	3.2259
							6.5463	18.639	9.724	9.1041	14.094	14.869	13.098	3.3079	6.8219	3.7956
							6.3785	18.425	9.3748	9.0966	13.998	14.357	13.861	3.7244	7.4033	3.3816
							5.6603	18.927	9.7465	9.7515	15.182	13.51	13.763	3.6177	6.7955	3.0469
							5.5946	18.519	8.7793	10.096	14.123	13.529	14.133	4.3508	7.3414	3.5337
							6.6064	18.234	9.3812	9.7946	14.792	13.791	14.202	3.8348	6.0397	3.3247
							7.1104	19.348	7.9925	9.0983	14.031	14.37	14.35	3.0882	7.5831	3.0281
							6.1375	21.371	7.7532	9.9839	12.777	13.081	14.232	3.4918	6.2116	4.961
							Avg. percent inhibitory connections per region per rat
							6.156	20.779	7.519	6.0154	17.199	14.677	10.731	2.9179	9.6823	4.3226
							4.756	17.911	7.8081	10.067	11.386	18.221	18.867	1.7356	7.6601	1.5868
							3.7065	12.363	12.388	6.8905	13.746	15.725	16.745	4.3035	9.9147	4.2182
							0	0	0	0	0	0	100	0	0	0
							0	14.815	22.222	27.778	3.7037	11.111	9.2593	0	11.111	0
							7.6577	17.32	9.955	6.3063	21.059	7.7703	17.838	1.509	9.2342	1.3514
							5.5556	16.869	10.985	7.8535	16.389	16.098	9.7727	3.2449	8.4975	4.7348
							6.3472	16.559	10.353	9.5721	13.452	14.796	13.987	4.224	7.2176	3.4913
							5.0713	22.611	9.9558	7.4567	14.134	12.397	16.169	2.1158	7.5126	2.5768
							5.8777	20.33	7.581	8.9845	14.207	12.908	14.161	4.4242	7.1521	4.3746
							8.1689	15.525	11.129	5.2068	17.868	17.563	12.639	3.2533	3.01	5.6368
							3.4091	15.025	9.596	9.0909	17.172	10.48	22.98	4.5455	4.2929	3.4091
							8.0325	18.323	10.405	6.8528	13.659	11.753	16.295	3.4924	5.3072	5.881
							Avg. percent of significant connections per region per rat (not raw number)
							7.0207	20.331	9.4131	8.8446	13.549	13.843	11.921	3.504	8.0844	3.4891	27.563	72.437
							6.1204	19.665	8.5462	9.7584	13.522	14.46	13.568	3.7329	7.4565	3.1695	26.545	73.455
							5.6178	18.837	9.9609	8.7908	13.405	15.439	13.911	3.5289	7.2525	3.2572	25.809	74.191
							2.25	16.227	8.7146	6.7222	11.81	25.137	18.215	2.5758	7.0996	1.25	17.886	82.114
							5.172	24.637	6.7201	13.033	12.187	14.136	12.359	3.6902	5.3183	2.7478	23.797	76.203
							6.5111	18.472	10.717	10.085	14.035	13.832	14.769	2.4039	6.0057	3.1685	26.118	73.882
							6.4624	18.358	9.6149	9.1071	14.264	14.909	13.231	3.31	6.9193	3.8247	27.861	72.139
							6.4289	18.107	9.4722	9.1655	13.938	14.386	13.871	3.85	7.3972	3.3844	27.602	72.398
							5.6171	19.296	9.8509	9.5482	15.01	13.376	14.004	3.5037	6.7915	3.0019	27.133	72.867
							5.5162	18.856	8.8574	10.039	14.141	13.421	13.92	4.4277	7.2718	3.5493	27.634	72.366
							6.6375	18.265	9.3609	9.7011	14.85	13.825	14.145	3.8159	6.021	3.3792	28.682	71.318
							6.8717	19.096	8.3275	9.0617	14.086	14.262	14.566	3.1068	7.4648	3.1577	27.223	75.409
							6.2533	20.048	7.801	9.209	12.807	14.275	14.953	3.7269	5.9443	4.9823	27.769	83.676

## Sheet: ISO_SYN
Avg number of units per region per rat																					Avg. percent most connected nodes per region per rat
Rat No	sDH	dDH	IG	VH																	sDH	dDH	IG	VH
1	1.0769	14.231	13.462	16.923					Synthetic isoflurane data												26.187	36.432	19.601	17.78
2	9.8333	24.778	15.389	16.167																	25.198	37.479	18.09	19.233
3	10.188	21.75	9.125	6.875																	26.2	37.603	18.073	18.124
4	5.4865	19.784	13.324	11.784																	25.264	37.988	18.729	18.018
5	20.6	32.8	16.2	12.2			Tables below organized as: rat number by connection														24.84	37.582	19.731	17.847
6	13.667	25	12.333	17.667																	26.887	32.515	18.563	22.035
7	5.0526	24.053	15.684	15.053			Connections are ordered:														26.009	36.972	18.072	18.947
8	7.2857	7.4762	7.2381	7.9524			sDH-sDH	sDH-dDH	sDH-IG	sDH-VH	dDH-dDH	dDH-IG	dDH-VH	IG-IG	IG-VH	VH-VH	within	between			23.015	37.757	18.176	21.053
9	3.8889	10.556	8.8333	10.722																	24.149	39.155	17.321	19.375
means	8.56432	20.0476	12.3987	12.8159
							Avg. percent excitatory connections per region per rat
							5.8996	19.08	10.528	9.2012	13.264	13.617	12.46	5.3328	6.8121	3.805
							6.9905	16.637	9.6655	9.5253	14.215	13.258	14.383	3.7905	7.5086	4.0264
							6.5939	18.163	9.6665	8.8396	14.904	13.733	14.117	3.4263	6.704	3.8519
							6.53	18.069	8.7302	9.558	14.662	15.115	14.101	3.1378	6.887	3.2099
							6.2117	18.607	9.5092	9.0701	14.057	14.389	14.111	3.5554	6.9068	3.583
							6.567	19.586	8.6631	11.219	12.166	13.919	13.197	3.8456	6.7283	4.1097
							6.0886	19.805	8.9078	9.5349	12.939	14.15	14.374	3.5161	6.296	4.3886
							6.9122	16.124	6.7613	9.8656	14.7	15.722	16.067	3.2511	6.695	3.9022
							4.8653	17.957	11.227	8.5356	14.764	13.159	15.49	2.8305	6.6599	4.5129
							Avg. percent inhibitory connections per region per rat
							8.0584	23.041	8.7113	11.375	15.67	10.206	10.704	5.4467	5.2405	1.5464
							4.9231	14.978	11.654	6.859	19.835	12.936	19.465	3.8462	5.119	0.38462
							8.3333	15.778	4.6296	8.8889	16.481	8.8889	18.778	8.1481	4.0741	6
							11.341	19.026	6.3526	8.2163	11.914	15.607	11.333	3.9795	9.5178	2.7127
							5.5105	19.506	11.803	7.6691	13.87	12.207	14.069	3.0937	9.1486	3.1225
							6.4916	17.265	7.6702	8.2983	11.543	13.667	15.878	3.4483	12.866	2.8736
							7.3567	17.022	11.684	7.3633	15.758	14.428	14.105	4.6435	5.3585	2.2802
							3.789	18.064	12.146	12.866	11.608	9.7311	16.771	4.7482	7.518	2.7578
							5.2391	24.486	9.7819	6.1452	14.871	14.755	15.123	1.4254	3.9907	4.1825
							Avg. percent of significant connections per region per rat (Not total number)
							6.4198	19.243	9.8653	9.3943	13.979	13.503	12.789	4.9458	6.3736	3.4865	28.831	74.63
							7.1021	16.948	9.1909	9.3859	14.739	13.209	14.366	3.5359	7.2895	4.2338	29.61	70.39
							7.0662	18.228	9.6764	9.037	14.458	13.738	13.966	3.5498	6.5535	3.7274	28.802	71.198
							6.9999	17.903	8.8471	9.3826	14.892	14.796	13.61	3.1445	7.0956	3.3288	28.366	74.615
							6.2238	18.554	9.7119	8.908	14.018	14.201	14.201	3.5152	7.077	3.5905	27.348	72.652
							6.5823	19.542	8.6569	11.093	12.025	14.171	13.268	3.6014	6.9796	4.0788	26.288	73.712
							6.1238	19.594	9.0244	9.4968	13.102	14.286	14.27	3.5612	6.2513	4.2908	27.077	72.923
							5.9122	16.964	7.66	10.807	14.237	13.504	16.83	3.4953	6.7892	3.8004	27.445	82.9
							4.9283	19.551	10.416	8.0135	14.842	13.324	15.865	2.4769	6.0484	4.5359	26.783	84.264

## Sheet: DrugvsSYN
						Avg. percent of significant connections per region per rat (not raw number)													ISO
					URE	0.32468	3.2545	1.0287	0	32.191	11.203	5.613	7.0505	7.4922	31.842	71.4082	28.5914		1.0379	0.27473	0	0.27473	7.2531	3.2325	4.0574	7.6344	8.3019	67.933	83.859	16.141
						1.2446	11.385	0.39483	0	46.485	11.802	8.5966	9.1253	5.058	5.9087	62.7636	37.2364		2.3855	17.053	1.2324	3.2068	11.513	13.34	5.7205	15.288	17.253	13.008	42.195	57.805
						1.3922	2.8263	2.4823	1.1313	20.619	8.3269	4.7353	42.721	10.261	5.5046	70.2368	29.7631		5.7049	6.4911	2.744	1.5185	37.975	3.1636	6.9702	10.739	3.5431	21.151	75.569	24.431
						0	0	0	0	8.3333	0	0	41.667	25	25	75.0003	25		3.5634	8.6117	2.279	2.4454	22.615	20.503	6.6028	14.808	8.5293	10.043	51.029	50.322
						0	0	0	0	16.026	24.573	0	16.026	1.9231	41.453	73.505	26.4961		11.873	14.315	4.8613	4.7403	29.401	7.3449	5.1141	9.0719	7.4849	5.7941	56.14	43.86
						1.4327	0	0.75758	1.2478	30.613	9.6914	6.8701	8.221	6.713	34.453	74.7197	25.2799		6.8188	10.18	0.77305	4.0108	32.607	3.1996	3.4827	10.681	14.151	14.096	64.203	35.797
						7.7334	6.3545	2.5173	3.3373	17.051	13.325	6.6973	11.473	10.841	20.669	56.9264	43.0724		3.7344	6.0136	1.4005	1.3094	29.277	11.298	2.5817	12.187	10.101	22.097	67.296	32.704
						12.987	6.0491	1.5652	1.0328	13.019	11.391	2.7567	29.981	12.882	8.3365	64.3235	35.6768		23.953	6.02	1.3005	2.1067	6.3955	4.3206	5.2047	29.611	2.0635	19.025	78.984	23.397
						31.125	13.53	1.4218	0.47856	19.124	3.5125	1.589	21.897	3.0247	4.2978	76.4438	23.5566		2.7158	6.6716	0.51151	1.5583	19.338	3.9127	1.4767	30.428	7.2409	26.147	78.628	21.372
						8.9076	17.645	3.568	4.7599	21.371	12.884	6.7693	9.7152	7.3588	7.0209	47.0147	52.985
						15.672	9.5173	3.9466	3.0027	49.029	5.6027	5.4411	2.4808	2.607	2.7012	69.883	30.1174
						24.953	7.243	0.62135	0.32895	36.164	3.105	3.1374	3.6295	8.3185	12.499	77.2455	22.7542
						15.46	3.6564	0.71942	0.66509	14.283	7.3779	3.5113	20.478	7.3796	26.47	76.691	23.3097
						9.32555	6.26624	1.46331	1.22957	24.9468	9.44572	4.28593	17.2666	8.37376	17.3966	68.9355	31.0645		6.86519	8.40341	1.67803	2.35233	21.8194	7.81277	4.57898	15.6054	8.74096	22.1438	66.4337	33.981
																			SYN ISO
					URE SYN	7.0207	20.331	9.4131	8.8446	13.549	13.843	11.921	3.504	8.0844	3.4891	27.5628	72.4371		6.4198	19.243	9.8653	9.3943	13.979	13.503	12.789	4.9458	6.3736	3.4865	28.831	74.63
						6.1204	19.665	8.5462	9.7584	13.522	14.46	13.568	3.7329	7.4565	3.1695	26.5448	73.4541		7.1021	16.948	9.1909	9.3859	14.739	13.209	14.366	3.5359	7.2895	4.2338	29.61	70.39
						5.6178	18.837	9.9609	8.7908	13.405	15.439	13.911	3.5289	7.2525	3.2572	25.8089	74.1912		7.0662	18.228	9.6764	9.037	14.458	13.738	13.966	3.5498	6.5535	3.7274	28.802	71.198
						2.25	16.227	8.7146	6.7222	11.81	25.137	18.215	2.5758	7.0996	1.25	17.8858	82.1154		6.9999	17.903	8.8471	9.3826	14.892	14.796	13.61	3.1445	7.0956	3.3288	28.366	74.615
						5.172	24.637	6.7201	13.033	12.187	14.136	12.359	3.6902	5.3183	2.7478	23.797	76.2034		6.2238	18.554	9.7119	8.908	14.018	14.201	14.201	3.5152	7.077	3.5905	27.348	72.652
						6.5111	18.472	10.717	10.085	14.035	13.832	14.769	2.4039	6.0057	3.1685	26.1185	73.8807		6.5823	19.542	8.6569	11.093	12.025	14.171	13.268	3.6014	6.9796	4.0788	26.288	73.712
						6.4624	18.358	9.6149	9.1071	14.264	14.909	13.231	3.31	6.9193	3.8247	27.8611	72.1393		6.1238	19.594	9.0244	9.4968	13.102	14.286	14.27	3.5612	6.2513	4.2908	27.077	72.923
						6.4289	18.107	9.4722	9.1655	13.938	14.386	13.871	3.85	7.3972	3.3844	27.6013	72.3989		5.9122	16.964	7.66	10.807	14.237	13.504	16.83	3.4953	6.7892	3.8004	27.445	82.9
						5.6171	19.296	9.8509	9.5482	15.01	13.376	14.004	3.5037	6.7915	3.0019	27.1327	72.8666		4.9283	19.551	10.416	8.0135	14.842	13.324	15.865	2.4769	6.0484	4.5359	26.783	84.264
						5.5162	18.856	8.8574	10.039	14.141	13.421	13.92	4.4277	7.2718	3.5493	27.6342	72.3652
						6.6375	18.265	9.3609	9.7011	14.85	13.825	14.145	3.8159	6.021	3.3792	28.6826	71.318
						6.8717	19.096	8.3275	9.0617	14.086	14.262	14.566	3.1068	7.4648	3.1577	27.2222	72.778
						6.2533	20.048	7.801	9.209	12.807	14.275	14.953	3.7269	5.9443	4.9823	27.7695	72.2303
						5.88301	19.2458	9.02744	9.46658	13.6618	15.0232	14.1102	3.47513	6.84822	3.25858	26.2786	73.7214		6.37316	18.503	9.22766	9.50201	14.0324	13.8591	14.3517	3.53622	6.71752	3.89699	27.8389	75.2538
