# Supplementary material for: Spontaneous neural synchrony links intrinsic spinal sensory and motor networks during unconsciousness
Source: eLife. 2021 May 27;10:e66308. doi: 10.7554/eLife.66308 (PMC8177891; doi:10.7554/eLife.66308)
Supplement: Source data 1. [file elife-66308-data1.xlsx]

## Sheet: Sheet1
Avg. num units per region per rat																					Avg. percent most connected nodes per region per rat
Rat number	sDH	dDH	IG	VH																Rat	sDH	dDH	IG	VH
1	4.1429	30.143	17.857	17.286																1	1.2987	43.68	15.595	39.426
2	5.625	38.625	23.75	20																2	8.5565	67.594	17.168	6.6815
3	7.5714	38.714	22.429	13						Urethane data										3	2.381	25.737	57.404	14.478
4	29	29	29	29																4	0	20	40	40
5	0	9	11.5	13																5	0	43.75	31.25	25
6	1.5833	18.083	12.667	15.75			Tables below organized as: rat number by connection													6	0.92593	39.048	15.46	44.567
7	12.318	24.955	16.682	17.5																7	10.989	27.538	25.745	35.728
8	22.833	28.833	22.5	14.667			Connections are ordered:													8	7.2222	15.873	55.357	21.548
9	27	36.667	22.333	13.333			sDH-sDH	sDH-dDH	sDH-IG	sDH-VH	dDH-dDH	dDH-IG	dDH-VH	IG-IG	IG-VH	VH-VH	within	between		9	50.899	13.704	32.063	3.3333
10	11.25	23	12.75	10.5																10	25.089	37.713	20.625	16.574
11	13.125	20.875	6.25	5.625																11	26.116	61.54	6.4062	5.9375
12	5.5789	15.684	5.0526	5.6316																12	27.588	41.113	13.162	18.137
13	4.6471	10.588	6.7647	6																13	22.45	23.33	26.403	27.818
							Avg. percent excitatory connections per region per rat
							0.37594	4.0414	0	0	35.78	13.18	5.5696	5.1001	6.5563	29.397
							1.4908	13.169	0.47484	0	49.881	11.826	7.9755	6.523	4.487	4.1733
							1.8923	3.3895	2.7081	1.4653	24.822	9.8315	5.8638	30.623	14.049	5.3547
							0	0	0	0	8.3333	0	0	41.667	25	25
							0	0	0	0	18.333	27.917	0	18.333	2.0833	33.333
							1.5754	0	0.75758	1.3131	30.939	10.011	7.4292	10.119	7.8778	29.978
							6.2755	6.0114	2.4016	2.6287	18.337	14.418	6.3004	11.639	12.09	19.899
							15.288	7.3111	1.7744	1.0136	13.584	11.439	3.2439	23.649	14.584	8.1133
							36.365	15.815	1.5245	0.57362	17.447	3.6614	1.7459	16.474	3.4659	2.9276
							9.3495	19.274	3.7529	5.106	20.654	14.332	7.2192	7.4468	7.9409	4.924
							16.451	10.005	3.7898	3.0985	48.004	5.5226	5.4814	2.6126	2.7606	2.2743
							26.096	7.5659	0.66047	0.35088	36.217	3.0598	3.3279	3.5194	9.6066	9.5956
							21.896	4.7705	0.64103	0.88319	14.513	10.404	4.2075	12.221	8.6313	21.832
							Avg. percent inhibitory connections per region per rat
							0	0	0	0	21.224	0	0	16.803	4.898	57.075
							0	0.96154	0	0	33.166	10.015	18.59	22.749	2.8846	11.635
							0	0	0	0	6.6057	2.2689	0	83.914	0.84034	6.3715
							0	0	0	0	0	0	0	0	0	100
							0	0	0	0	9.2593	0	0	0	0	90.741
							20.401	9.129	1.2626	4.0497	16.599	1.6327	1.1132	11.315	0.4329	34.065
							4.0645	0.69264	0.92593	1.0714	11.333	9.4888	0.46296	56.241	6.5003	9.2197
							7.4192	3.0277	1.0753	0	26.049	2.5032	0.87719	47.703	0.81301	10.532
							5.4545	1.8182	1.25	0	25.154	3.0357	3.125	25.156	1.25	33.756
							4.057	15	1.25	0.65789	63.004	4.4079	1.9737	0	0	9.6491
							11.111	0	0	0	52.315	0	0	3.0093	0	33.565
							0	0.65934	1.3187	0.21978	7.8705	1.6484	1.3403	22.739	7.2161	56.988
							Avg. percent of significant connections per region per rat (not raw number)
							0.32468	3.2545	1.0287	0	32.191	11.203	5.613	7.0505	7.4922	31.842	71.409	28.591
							1.2446	11.385	0.39483	0	46.485	11.802	8.5966	9.1253	5.058	5.9087	62.763	37.237
							1.3922	2.8263	2.4823	1.1313	20.619	8.3269	4.7353	42.721	10.261	5.5046	70.237	29.763
							0	0	0	0	8.3333	0	0	41.667	25	25	75	25
							0	0	0	0	16.026	24.573	0	16.026	1.9231	41.453	73.504	26.496
							1.4327	0	0.75758	1.2478	30.613	9.6914	6.8701	8.221	6.713	34.453	74.72	25.28
							7.7334	6.3545	2.5173	3.3373	17.051	13.325	6.6973	11.473	10.841	20.669	56.927	43.073
							12.987	6.0491	1.5652	1.0328	13.019	11.391	2.7567	29.981	12.882	8.3365	64.323	35.677
							31.125	13.53	1.4218	0.47856	19.124	3.5125	1.589	21.897	3.0247	4.2978	76.444	23.556
							8.9076	17.645	3.568	4.7599	21.371	12.884	6.7693	9.7152	7.3588	7.0209	47.015	52.985
							15.672	9.5173	3.9466	3.0027	49.029	5.6027	5.4411	2.4808	2.607	2.7012	69.883	30.117
							24.953	7.243	0.62135	0.32895	36.164	3.105	3.1374	3.6295	8.3185	12.499	77.246	22.754
							15.46	3.6564	0.71942	0.66509	14.283	7.3779	3.5113	20.478	7.3796	26.47	76.691	23.3097
