# Supplementary material for: Spontaneous neural synchrony links intrinsic spinal sensory and motor networks during unconsciousness
Source: eLife. 2021 May 27;10:e66308. doi: 10.7554/eLife.66308 (PMC8177891; doi:10.7554/eLife.66308)
Supplement: Source data 2. [file elife-66308-data2.xlsx]

## Sheet: Sheet1
Avg number of units per region per rat																					Avg. percent most connected nodes per region per rat
Rat No	sDH	dDH	IG	VH																Rat	sDH	dDH	IG	VH
1	1.0769	14.231	13.462	16.923																1	1.5385	12.564	13.846	72.051
2	9.8333	24.778	15.389	16.167																2	12.259	29.506	31.688	26.547
3	10.188	21.75	9.125	6.875					Isoflurane data											3	8.2465	49.392	12.361	30
4	5.4865	19.784	13.324	11.784																4	9.255	42.691	29.502	18.552
5	20.6	32.8	16.2	12.2																5	27.673	41.677	19.991	10.659
6	13.667	25	12.333	17.667			Tables below organized as: rat number by connection													6	13.561	45.379	15.833	25.227
7	5.0526	24.053	15.684	15.053																7	6.1784	45.015	20.922	27.885
8	7.2857	7.4762	7.2381	7.9524			Connections are ordered:													8	29.282	15.879	28.617	26.223
9	3.8889	10.556	8.8333	10.722			sDH-sDH	sDH-dDH	sDH-IG	sDH-VH	dDH-dDH	dDH-IG	dDH-VH	IG-IG	IG-VH	VH-VH	within	between		9	10.485	26.252	30.502	32.761
							Avg. percent excitatory connections per region per rat
							1.355	0.32051	0	0.32051	8.952	2.9059	3.3356	6.9092	9.8811	66.02
							2.4956	17.392	1.4095	2.4584	11.549	13.932	4.5491	16.281	18.847	11.087
							5.6208	6.5108	2.8637	1.347	39.917	3.0795	7.3028	11.069	3.9901	18.299
							3.446	9.3598	1.2857	2.5765	23.076	22.404	4.8775	15.239	9.0974	8.6382
							12.233	15.259	5.3256	5.1555	27.365	7.777	5.0879	8.0227	8.0321	5.7427
							7.8841	11.811	0.89987	4.7057	34.623	3.0579	4.0765	6.6545	14.869	11.418
							4.0733	6.5921	1.5979	1.4593	30.24	11.561	2.7566	10.211	11.164	20.344
							29.616	6.971	1.5568	2.4405	10.229	5.6838	6.25	20.327	3.9683	12.957
							4.1748	9.2227	0.78431	1.781	27.344	5.2451	1.4706	19.232	10.56	20.186
							Avg. percent inhibitory connections per region per rat
							0	0	0	0	0	0	0	8.8339	1.5385	89.628
							3.0303	4.8485	0	3.0303	6.6667	0	3.0303	5.303	1.8182	72.273
							7.1429	3.5714	0	0	28.571	0	1.2987	0	0	59.416
							8.3333	0	0	0	17.708	7.7778	9.1667	20.625	1.6667	34.722
							7.3964	6.0514	0.85236	2.5928	46.577	4.2776	4.736	17.161	3.4002	6.9546
							0	0	0	0	19.389	4.1667	0	35.222	5.3333	35.889
							0	0.55556	0	0	19.365	6.8122	1.2037	39.048	0.37037	32.646
							5.4386	0.87719	1.0526	1.7105	0	2.2953	1.7544	56.591	0.95694	29.323
							0.45249	0	0	0	5.3167	0	0.4902	66.408	0.84034	26.492
							Avg. percent of significant connections per region per rat (Not total number)
							1.0379	0.27473	0	0.27473	7.2531	3.2325	4.0574	7.6344	8.3019	67.933	83.859	16.141			83.8584	16.1413	99.9997
							2.3855	17.053	1.2324	3.2068	11.513	13.34	5.7205	15.288	17.253	13.008	42.195	57.805			42.1945	57.8057	100
							5.7049	6.4911	2.744	1.5185	37.975	3.1636	6.9702	10.739	3.5431	21.151	75.569	24.431			75.5699	24.4305	100
							3.5634	8.6117	2.279	2.4454	22.615	20.503	6.6028	14.808	8.5293	10.043	51.029	50.322			51.0294	48.9712	100.001
							11.873	14.315	4.8613	4.7403	29.401	7.3449	5.1141	9.0719	7.4849	5.7941	56.14	43.86			56.14	43.8605	100.001
							6.8188	10.18	0.77305	4.0108	32.607	3.1996	3.4827	10.681	14.151	14.096	64.203	35.797			64.2028	35.7972	99.9999
							3.7344	6.0136	1.4005	1.3094	29.277	11.298	2.5817	12.187	10.101	22.097	67.296	32.704			67.2954	32.7042	99.9996
							23.953	6.02	1.3005	2.1067	6.3955	4.3206	5.2047	29.611	2.0635	19.025	78.984	23.397			78.9845	21.016	100
							2.7158	6.6716	0.51151	1.5583	19.338	3.9127	1.4767	30.428	7.2409	26.147	78.628	21.372
