# Supplementary material for: Spontaneous neural synchrony links intrinsic spinal sensory and motor networks during unconsciousness
Source: eLife. 2021 May 27;10:e66308. doi: 10.7554/eLife.66308 (PMC8177891; doi:10.7554/eLife.66308)
Supplement: Supplementary file 1. — Enclosed are raw ANOVA (et al.) tables for all statistical comparisons presented in the article. Each table is individually labeled as indicated in the main text and located on a separate tab within the workbook. [file elife-66308-supp1.xlsx]

## Sheet: 1a
Supplementary File 1a
Average number of units per anatomical region – urethane
	N		Mean			Std. Deviation			Std. Error			95% Confidence Interval for Mean						Minimum		Maximum
												Lower Bound			Upper Bound
sDH	13		11.1288			9.54466			2.64721			5.361			16.8966			0		29
dDH	13		24.9359			9.94266			2.7576			18.9276			30.9442			9		38.71
IG	13		16.1181			7.63001			2.11618			11.5073			20.7289			5.05		29
VH	13		13.9456			6.49604			1.80168			10.0201			17.8711			5.63		29
Total	52		16.5321			9.77324			1.3553			13.8112			19.253			0		38.71
ANOVA
				Sum of Squares			df			Mean Square			F			Sig.
Anatomical region				1386.86			3			462.285			6.368			0.001
Within Groups				3484.47			48			72.593
Total				4871.33			51
Bonferroni
(I) region		(J) region			Mean Difference (I-J)			Std. Error			Sig.			95% Confidence Interval
														Lower Bound			Upper Bound
sDH		dDH			-13.80711*			3.34188			0.001			-23.004			-4.6102
		IG			-4.98928			3.34188			0.852			-14.1862			4.2077
		VH			-2.81677			3.34188			1			-12.0137			6.3802
dDH		sDH			13.80711*			3.34188			0.001			4.6102			23.004
		IG			8.81782			3.34188			0.067			-0.3791			18.0148
		VH			10.99034*			3.34188			0.011			1.7934			20.1873
IG		sDH			4.98928			3.34188			0.852			-4.2077			14.1862
		dDH			-8.81782			3.34188			0.067			-18.0148			0.3791
		VH			2.17252			3.34188			1			-7.0244			11.3695
VH		sDH			2.81677			3.34188			1			-6.3802			12.0137
		dDH			-10.99034*			3.34188			0.011			-20.1873			-1.7934
		IG			-2.17252			3.34188			1			-11.3695			7.0244
*. The mean difference is significant at the 0.05 level.

## Sheet: 1b
Supplementary file 1b
Anatomical region of synchronous unit pairs – urethane									Pairwise Comparisons
Source		Type III Sum of Squares	df	Mean Square	F	Sig.			(I) region	(J) region	Mean Difference (I-J)	Std. Error	Sig.a	95% Confidence Interval for Differencea
Anatomical region of synchronous unit pairs	Sphericity Assumed	6899.27	9	766.585	9.277	0								Lower Bound	Upper Bound
	Greenhouse-Geisser	6899.27	3.077	2242.5	9.277	0			sDH-sDH	sDH-dDH	3.059	2.429	1	-7.285	13.404
	Huynh-Feldt	6899.27	4.258	1620.31	9.277	0				sDH-IG	7.862	2.79	0.699	-4.019	19.744
	Lower-bound	6899.27	1	6899.27	9.277	0.01				sDH-VH	8.096	2.835	0.651	-3.977	20.169
Error(region)	Sphericity Assumed	8924.11	108	82.631						dDH-dDH	-15.621	4.431	0.188	-34.49	3.248
	Greenhouse-Geisser	8924.11	36.919	241.721						dDH-IG	-0.12	3.927	1	-16.842	16.602
	Huynh-Feldt	8924.11	51.096	174.654						dDH-VH	5.04	3.099	1	-8.158	18.238
	Lower-bound	8924.11	12	743.676						IG-IG	-7.941	5.112	1	-29.71	13.828
										IG-VH	0.952	3.672	1	-14.685	16.589
Proportion of significant connections per region – urethane										VH-VH	-8.071	5.648	1	-32.119	15.977
region	Mean	Std. Error	95% Confidence Interval						sDH-dDH	sDH-sDH	-3.059	2.429	1	-13.404	7.285
			Lower Bound	Upper Bound						sDH-IG	4.803	1.363	0.188	-0.999	10.605
sDH-sDH	9.326	2.841	3.136	15.515						sDH-VH	5.037	1.351	0.13	-0.716	10.789
sDH-dDH	6.266	1.531	2.931	9.601						dDH-dDH	-18.681*	3.426	0.007	-33.271	-4.09
sDH-IG	1.463	0.359	0.681	2.246						dDH-IG	-3.179	2.41	1	-13.443	7.085
sDH-VH	1.23	0.422	0.309	2.15						dDH-VH	1.98	1.429	1	-4.104	8.065
dDH-dDH	24.947	3.575	17.158	32.736						IG-IG	-11	4.512	1	-30.213	8.213
dDH-IG	9.446	1.704	5.732	13.159						IG-VH	-2.108	2.625	1	-13.286	9.071
dDH-VH	4.286	0.755	2.642	5.93						VH-VH	-11.13	4.921	1	-32.083	9.822
IG-IG	17.267	3.743	9.111	25.422					sDH-IG	sDH-sDH	-7.862	2.79	0.699	-19.744	4.019
IG-VH	8.374	1.653	4.771	11.976						sDH-dDH	-4.803	1.363	0.188	-10.605	0.999
VH-VH	17.397	3.672	9.395	25.398						sDH-VH	0.234	0.209	1	-0.656	1.124
										dDH-dDH	-23.483*	3.513	0.001	-38.442	-8.525
										dDH-IG	-7.982*	1.756	0.03	-15.458	-0.506
										dDH-VH	-2.823	0.683	0.062	-5.729	0.084
										IG-IG	-15.803	3.823	0.062	-32.082	0.476
										IG-VH	-6.91	1.767	0.093	-14.435	0.614
										VH-VH	-15.933	3.897	0.068	-32.526	0.659
									sDH-VH	sDH-sDH	-8.096	2.835	0.651	-20.169	3.977
										sDH-dDH	-5.037	1.351	0.13	-10.789	0.716
										sDH-IG	-0.234	0.209	1	-1.124	0.656
										dDH-dDH	-23.717*	3.577	0.001	-38.95	-8.485
										dDH-IG	-8.216*	1.71	0.019	-15.496	-0.937
										dDH-VH	-3.056*	0.67	0.029	-5.909	-0.203
										IG-IG	-16.037	3.883	0.063	-32.571	0.497
										IG-VH	-7.144	1.753	0.069	-14.607	0.318
										VH-VH	-16.167	3.843	0.055	-32.53	0.196
									dDH-dDH	sDH-sDH	15.621	4.431	0.188	-3.248	34.49
										sDH-dDH	18.681*	3.426	0.007	4.09	33.271
										sDH-IG	23.483*	3.513	0.001	8.525	38.442
										sDH-VH	23.717*	3.577	0.001	8.485	38.95
										dDH-IG	15.501	4.09	0.116	-1.915	32.917
										dDH-VH	20.661*	3.177	0.001	7.132	34.19
										IG-IG	7.68	6.741	1	-21.022	36.383
										IG-VH	16.573	4.657	0.177	-3.256	36.402
										VH-VH	7.55	5.877	1	-17.476	32.577
									dDH-IG	sDH-sDH	0.12	3.927	1	-16.602	16.842
										sDH-dDH	3.179	2.41	1	-7.085	13.443
										sDH-IG	7.982*	1.756	0.03	0.506	15.458
										sDH-VH	8.216*	1.71	0.019	0.937	15.496
										dDH-dDH	-15.501	4.09	0.116	-32.917	1.915
										dDH-VH	5.16	1.781	0.602	-2.423	12.742
										IG-IG	-7.821	4.459	1	-26.81	11.168
										IG-VH	1.072	2.854	1	-11.079	13.223
										VH-VH	-7.951	3.33	1	-22.128	6.227
									dDH-VH	sDH-sDH	-5.04	3.099	1	-18.238	8.158
										sDH-dDH	-1.98	1.429	1	-8.065	4.104
										sDH-IG	2.823	0.683	0.062	-0.084	5.729
										sDH-VH	3.056*	0.67	0.029	0.203	5.909
										dDH-dDH	-20.661*	3.177	0.001	-34.19	-7.132
										dDH-IG	-5.16	1.781	0.602	-12.742	2.423
										IG-IG	-12.981	4.184	0.412	-30.799	4.838
										IG-VH	-4.088	2.01	1	-12.645	4.469
										VH-VH	-13.111	3.94	0.271	-29.887	3.665
									IG-IG	sDH-sDH	7.941	5.112	1	-13.828	29.71
										sDH-dDH	11	4.512	1	-8.213	30.213
										sDH-IG	15.803	3.823	0.062	-0.476	32.082
										sDH-VH	16.037	3.883	0.063	-0.497	32.571
										dDH-dDH	-7.68	6.741	1	-36.383	21.022
										dDH-IG	7.821	4.459	1	-11.168	26.81
										dDH-VH	12.981	4.184	0.412	-4.838	30.799
										IG-VH	8.893	2.963	0.497	-3.723	21.509
										VH-VH	-0.13	5.434	1	-23.27	23.01
									IG-VH	sDH-sDH	-0.952	3.672	1	-16.589	14.685
										sDH-dDH	2.108	2.625	1	-9.071	13.286
										sDH-IG	6.91	1.767	0.093	-0.614	14.435
										sDH-VH	7.144	1.753	0.069	-0.318	14.607
										dDH-dDH	-16.573	4.657	0.177	-36.402	3.256
										dDH-IG	-1.072	2.854	1	-13.223	11.079
										dDH-VH	4.088	2.01	1	-4.469	12.645
										IG-IG	-8.893	2.963	0.497	-21.509	3.723
										VH-VH	-9.023	3.915	1	-25.693	7.648
									VH-VH	sDH-sDH	8.071	5.648	1	-15.977	32.119
										sDH-dDH	11.13	4.921	1	-9.822	32.083
										sDH-IG	15.933	3.897	0.068	-0.659	32.526
										sDH-VH	16.167	3.843	0.055	-0.196	32.53
										dDH-dDH	-7.55	5.877	1	-32.577	17.476
										dDH-IG	7.951	3.33	1	-6.227	22.128
										dDH-VH	13.111	3.94	0.271	-3.665	29.887
										IG-IG	0.13	5.434	1	-23.01	23.27
										IG-VH	9.023	3.915	1	-7.648	25.693
									Based on estimated marginal means
									a. Adjustment for multiple comparisons: Bonferroni.
									*. The mean difference is significant at the alpha = 0.05 level.

## Sheet: 1c
Supplementary file 1c
Most connected nodes – urethane
	N		Mean			Std. Deviation			Std. Error			95% Confidence Interval for Mean						Minimum		Maximum
												Lower Bound			Upper Bound
sDH	13		14.1166			15.3597			4.26002			4.8348			23.3983			0		50.9
dDH	13		35.4323			16.5815			4.59889			25.4122			45.4524			13.7		67.59
IG	13		27.4337			15.6973			4.35364			17.9479			36.9195			6.41		57.4
VH	13		23.0176			13.8354			3.83726			14.6569			31.3782			3.33		44.57
Total	52		25			16.8424			2.33563			20.3111			29.689			0		67.59
ANOVA
				Sum of Squares			df			Mean Square			F			Sig.
Anatomical region				3082.76			3			1027.59			4.333			0.009
Within Groups				11384.3			48			237.173
Total				14467.1			51
Post-hoc comparisons
Bonferroni
(I) region		(J) region			Mean Difference (I-J)			Std. Error			Sig.			95% Confidence Interval
														Lower Bound			Upper Bound
sDH		dDH			-21.31574*			6.04054			0.006			-37.9395			-4.692
		IG			-13.3171			6.04054			0.194			-29.9409			3.3066
		VH			-8.901			6.04054			0.883			-25.5247			7.7227
dDH		sDH			21.31574*			6.04054			0.006			4.692			37.9395
		IG			7.9986			6.04054			1			-8.6251			24.6223
		VH			12.4147			6.04054			0.272			-4.209			29.0385
IG		sDH			13.3171			6.04054			0.194			-3.3066			29.9409
		dDH			-7.9986			6.04054			1			-24.6223			8.6251
		VH			4.41615			6.04054			1			-12.2076			21.0399
VH		sDH			8.901			6.04054			0.883			-7.7227			25.5247
		dDH			-12.4147			6.04054			0.272			-29.0385			4.209
		IG			-4.41615			6.04054			1			-21.0399			12.2076
*. The mean difference is significant at the 0.05 level.

## Sheet: 1d
Supplementary file 1d
Average number of units per anatomical region – isoflurane
	N	Mean	Std. Deviation	Std. Error	95% Confidence Interval for Mean		Minimum	Maximum
					Lower Bound	Upper Bound
sDH	9	8.5643	5.87902	1.95967	4.0453	13.0833	1.08	20.6
dDH	9	20.0476	7.98828	2.66276	13.9072	26.1879	7.48	32.8
IG	9	12.3987	3.28324	1.09441	9.875	14.9224	7.24	16.2
VH	9	12.8159	3.89571	1.29857	9.8214	15.8104	6.88	17.67
Total	36	13.4566	6.79243	1.13207	11.1584	15.7549	1.08	32.8
ANOVA
	Sum of Squares	df	Mean Square	F	Sig.
Anatomical region	620.145	3	206.715	6.65	0.001
Within Groups	994.653	32	31.083
Total	1614.8	35
Bonferroni
(I) Region	(J) Region	Mean Difference (I-J)	Std. Error	Sig.	95% Confidence Interval
					Lower Bound	Upper Bound
sDH	dDH	-11.48326*	2.62818	0.001	-18.8746	-4.0919
	IG	-3.83439	2.62818	0.926	-11.2257	3.5569
	VH	-4.25161	2.62818	0.693	-11.6429	3.1397
dDH	sDH	11.48326*	2.62818	0.001	4.0919	18.8746
	IG	7.64887*	2.62818	0.039	0.2575	15.0402
	VH	7.23164	2.62818	0.058	-0.1597	14.623
IG	sDH	3.83439	2.62818	0.926	-3.5569	11.2257
	dDH	-7.64887*	2.62818	0.039	-15.0402	-0.2575
	VH	-0.41722	2.62818	1	-7.8086	6.9741
VH	sDH	4.25161	2.62818	0.693	-3.1397	11.6429
	dDH	-7.23164	2.62818	0.058	-14.623	0.1597
	IG	0.41722	2.62818	1	-6.9741	7.8086
*. The mean difference is significant at the 0.05 level.

## Sheet: 1e
Supplementary file 1e
Anatomical region of synchronous unit pairs – isoflurane
Measure:MEASURE_1								Pairwise Comparisons
Source		Type III Sum of Squares	df	Mean Square	F	Sig.		Measure:MEASURE_1
Anatomical region of synchronous unit pairs	Sphericity Assumed	4450.18	9	494.465	6.517	0		(I) region	(J) region	Mean Difference (I-J)	Std. Error	Sig.a	95% Confidence Interval for Differencea
	Greenhouse-Geisser	4450.18	2.479	1795.06	6.517	0.004							Lower Bound	Upper Bound
	Huynh-Feldt	4450.18	3.679	1209.57	6.517	0.001		sDH-sDH	sDH-dDH	-1.538	2.839	1	-15.61	12.534
	Lower-bound	4450.18	1	4450.18	6.517	0.034			sDH-IG	5.187	2.297	1	-6.198	16.572
Error(region)	Sphericity Assumed	5463.21	72	75.878					sDH-VH	4.513	2.297	1	-6.875	15.9
	Greenhouse-Geisser	5463.21	19.833	275.46					dDH-dDH	-14.954	4.892	0.704	-39.202	9.294
	Huynh-Feldt	5463.21	29.433	185.614					dDH-IG	-0.948	3.512	1	-18.354	16.459
	Lower-bound	5463.21	8	682.901					dDH-VH	2.286	2.343	1	-9.327	13.9
									IG-IG	-8.74	2.81	0.649	-22.668	5.188
									IG-VH	-1.876	3.505	1	-19.251	15.5
Proportion of significant connections per region – isoflurane									VH-VH	-15.279	7.234	1	-51.137	20.58
region	Mean	Std. Error	95% Confidence Interval					sDH-dDH	sDH-sDH	1.538	2.839	1	-12.534	15.61
			Lower Bound	Upper Bound					sDH-IG	6.725	1.476	0.084	-0.59	14.04
sDH-sDH	6.865	2.387	1.36	12.37					sDH-VH	6.051	1.282	0.067	-0.301	12.404
sDH-dDH	8.403	1.654	4.588	12.219					dDH-dDH	-13.416	3.871	0.383	-32.607	5.775
sDH-IG	1.678	0.487	0.556	2.8					dDH-IG	0.591	2.067	1	-9.655	10.836
sDH-VH	2.352	0.471	1.266	3.439					dDH-VH	3.824	1.6	1	-4.106	11.755
dDH-dDH	21.819	3.825	12.998	30.641					IG-IG	-7.202	3.403	1	-24.069	9.665
dDH-IG	7.813	2.025	3.143	12.482					IG-VH	-0.338	1.524	1	-7.893	7.217
dDH-VH	4.579	0.611	3.17	5.988					VH-VH	-13.74	7.46	1	-50.719	23.238
IG-IG	15.605	2.844	9.047	22.164				sDH-IG	sDH-sDH	-5.187	2.297	1	-16.572	6.198
IG-VH	8.741	1.578	5.103	12.379					sDH-dDH	-6.725	1.476	0.084	-14.04	0.59
VH-VH	22.144	6.107	8.061	36.227					sDH-VH	-0.674	0.436	1	-2.834	1.485
									dDH-dDH	-20.141*	3.604	0.023	-38.005	-2.277
									dDH-IG	-6.135	1.977	0.656	-15.933	3.664
									dDH-VH	-2.901*	0.558	0.037	-5.666	-0.136
									IG-IG	-13.927	3.027	0.079	-28.932	1.078
									IG-VH	-7.063	1.763	0.176	-15.801	1.675
									VH-VH	-20.466	6.413	0.575	-52.255	11.323
								sDH-VH	sDH-sDH	-4.513	2.297	1	-15.9	6.875
									sDH-dDH	-6.051	1.282	0.067	-12.404	0.301
									sDH-IG	0.674	0.436	1	-1.485	2.834
									dDH-dDH	-19.467*	3.7	0.034	-37.806	-1.128
									dDH-IG	-5.46	2.005	1	-15.401	4.48
									dDH-VH	-2.227	0.694	0.559	-5.666	1.212
									IG-IG	-13.253	2.955	0.092	-27.901	1.395
									IG-VH	-6.389	1.469	0.11	-13.672	0.895
									VH-VH	-19.791	6.474	0.704	-51.881	12.298
								dDH-dDH	sDH-sDH	14.954	4.892	0.704	-9.294	39.202
									sDH-dDH	13.416	3.871	0.383	-5.775	32.607
									sDH-IG	20.141*	3.604	0.023	2.277	38.005
									sDH-VH	19.467*	3.7	0.034	1.128	37.806
									dDH-IG	14.007	4.389	0.575	-7.749	35.762
									dDH-VH	17.24	3.832	0.09	-1.757	36.238
									IG-IG	6.214	5.674	1	-21.91	34.338
									IG-VH	13.078	4.137	0.602	-7.429	33.586
									VH-VH	-0.324	8.565	1	-42.781	42.132
								dDH-IG	sDH-sDH	0.948	3.512	1	-16.459	18.354
									sDH-dDH	-0.591	2.067	1	-10.836	9.655
									sDH-IG	6.135	1.977	0.656	-3.664	15.933
									sDH-VH	5.46	2.005	1	-4.48	15.401
									dDH-dDH	-14.007	4.389	0.575	-35.762	7.749
									dDH-VH	3.234	1.901	1	-6.187	12.655
									IG-IG	-7.793	3.668	1	-25.976	10.391
									IG-VH	-0.928	2.089	1	-11.285	9.429
									VH-VH	-14.331	7.187	1	-49.957	21.295
								dDH-VH	sDH-sDH	-2.286	2.343	1	-13.9	9.327
									sDH-dDH	-3.824	1.6	1	-11.755	4.106
									sDH-IG	2.901*	0.558	0.037	0.136	5.666
									sDH-VH	2.227	0.694	0.559	-1.212	5.666
									dDH-dDH	-17.24	3.832	0.09	-36.238	1.757
									dDH-IG	-3.234	1.901	1	-12.655	6.187
									IG-IG	-11.026	3.085	0.326	-26.318	4.266
									IG-VH	-4.162	1.786	1	-13.015	4.691
									VH-VH	-17.565	6.306	1	-48.823	13.693
								IG-IG	sDH-sDH	8.74	2.81	0.649	-5.188	22.668
									sDH-dDH	7.202	3.403	1	-9.665	24.069
									sDH-IG	13.927	3.027	0.079	-1.078	28.932
									sDH-VH	13.253	2.955	0.092	-1.395	27.901
									dDH-dDH	-6.214	5.674	1	-34.338	21.91
									dDH-IG	7.793	3.668	1	-10.391	25.976
									dDH-VH	11.026	3.085	0.326	-4.266	26.318
									IG-VH	6.864	3.702	1	-11.487	25.216
									VH-VH	-6.538	7.109	1	-41.776	28.7
								IG-VH	sDH-sDH	1.876	3.505	1	-15.5	19.251
									sDH-dDH	0.338	1.524	1	-7.217	7.893
									sDH-IG	7.063	1.763	0.176	-1.675	15.801
									sDH-VH	6.389	1.469	0.11	-0.895	13.672
									dDH-dDH	-13.078	4.137	0.602	-33.586	7.429
									dDH-IG	0.928	2.089	1	-9.429	11.285
									dDH-VH	4.162	1.786	1	-4.691	13.015
									IG-IG	-6.864	3.702	1	-25.216	11.487
									VH-VH	-13.403	6.521	1	-45.726	18.92
								VH-VH	sDH-sDH	15.279	7.234	1	-20.58	51.137
									sDH-dDH	13.74	7.46	1	-23.238	50.719
									sDH-IG	20.466	6.413	0.575	-11.323	52.255
									sDH-VH	19.791	6.474	0.704	-12.298	51.881
									dDH-dDH	0.324	8.565	1	-42.132	42.781
									dDH-IG	14.331	7.187	1	-21.295	49.957
									dDH-VH	17.565	6.306	1	-13.693	48.823
									IG-IG	6.538	7.109	1	-28.7	41.776
									IG-VH	13.403	6.521	1	-18.92	45.726
								Based on estimated marginal means
								a. Adjustment for multiple comparisons: Bonferroni.
								*. The mean difference is significant at the alpha = 0.05 level.

## Sheet: 1f
Supplementary file 1f
Most connected nodes – isoflurane
	N	Mean		Std. Deviation		Std. Error		95% Confidence Interval for Mean			Minimum		Maximum
								Lower Bound	Upper Bound
sDH	9	13.1643		9.36661		3.1222		5.9644	20.3641		1.54		29.28
dDH	9	34.2617		13.6459		4.54863		23.7725	44.7508		12.56		49.39
IG	9	22.5847		7.63018		2.54339		16.7196	28.4497		12.36		31.69
VH	9	29.9894		17.0825		5.69415		16.8587	43.1202		10.66		72.05
Total	36	25		14.4431		2.40718		20.1132	29.8869		1.54		72.05
ANOVA
			Sum of Squares		df		Mean Square			F		Sig.
Anatomical region			2309.32		3		769.774			4.935		0.006
Within Groups			4991.79		32		155.993
Total			7301.11		35
Post-hoc Comparisons
Bonferroni
(I) region	(J) region	Mean Difference (I-J)	Std. Error	Sig.	95% Confidence Interval
					Lower Bound	Upper Bound
sDH	dDH	-21.09740*	5.88772	0.007	-37.6557	-4.5391
	IG	-9.4204	5.88772	0.717	-25.9787	7.1379
	VH	-16.82518*	5.88772	0.045	-33.3835	-0.2669
dDH	sDH	21.09740*	5.88772	0.007	4.5391	37.6557
	IG	11.677	5.88772	0.336	-4.8813	28.2353
	VH	4.27222	5.88772	1	-12.2861	20.8305
IG	sDH	9.4204	5.88772	0.717	-7.1379	25.9787
	dDH	-11.677	5.88772	0.336	-28.2353	4.8813
	VH	-7.40478	5.88772	1	-23.9631	9.1535
VH	sDH	16.82518*	5.88772	0.045	0.2669	33.3835
	dDH	-4.27222	5.88772	1	-20.8305	12.2861
	IG	7.40478	5.88772	1	-9.1535	23.9631
*. The mean difference is significant at the 0.05 level.

## Sheet: 1g
Supplementary file 1g
Anatomical region, anesthetic agent, and connection polarity: excitatory connections only
Source		Type III Sum of Squares	df	Mean Square	F	Sig.
Anatomical region	Sphericity Assumed	9734.82	9	1081.65	13.981	0
	Greenhouse-Geisser	9734.82	3.479	2798.37	13.981	0
	Huynh-Feldt	9734.82	4.511	2157.87	13.981	0
	Lower-bound	9734.82	1	9734.82	13.981	0.001
Anatomical region * Anesthetic agent	Sphericity Assumed	242.113	9	26.901	0.348	0.957
	Greenhouse-Geisser	242.113	3.479	69.598	0.348	0.819
	Huynh-Feldt	242.113	4.511	53.668	0.348	0.866
	Lower-bound	242.113	1	242.113	0.348	0.562
Error(region)	Sphericity Assumed	13925.5	180	77.364
	Greenhouse-Geisser	13925.5	69.575	200.151
	Huynh-Feldt	13925.5	90.226	154.34
	Lower-bound	13925.5	20	696.276
Tests of Between-Subjects Effects
Measure: Anesthetic agent
Source	Type III Sum of Squares	df	Mean Square	F	Sig.
Intercept	21272.7	1	21272.7	857400000000	0
Anesthetic agent	7.351e-10	1	7.351e-10	0.03	0.865
Error	4.962e-07	20	2.481e-08
Pairwise Comparisons
(I) Urethane	(J) Isoflurane	Mean Difference (I-J)	Std. Error	Sig.a	95% Confidence Interval for Differencea
					Lower Bound	Upper Bound
Urethane	Isoflurane	3.718e-06	0	0.865	-4.134e-05	4.877e-05
Isoflurane	Urethane	-3.718e-06	0	0.865	-4.877e-05	4.134e-05
Based on estimated marginal means
a. Adjustment for multiple comparisons: Bonferroni.

## Sheet: 1h
Supplementary file 1h
Anatomical region, anesthetic agent, and connection polarity: inhibitory connections only
Source		Type III Sum of Squares	df	Mean Square	F	Sig.
Anatomical region	Sphericity Assumed	36025.3	9	4002.81	19.403	0
	Greenhouse-Geisser	36025.3	2.001	18007.7	19.403	0
	Huynh-Feldt	36025.3	2.334	15434.5	19.403	0
	Lower-bound	36025.3	1	36025.3	19.403	0
Anatomical region * Anesthetic agent	Sphericity Assumed	429.771	9	47.752	0.231	0.99
	Greenhouse-Geisser	429.771	2.001	214.826	0.231	0.794
	Huynh-Feldt	429.771	2.334	184.128	0.231	0.827
	Lower-bound	429.771	1	429.771	0.231	0.636
Error(region)	Sphericity Assumed	37134.3	180	206.302
	Greenhouse-Geisser	37134.3	40.011	928.099
	Huynh-Feldt	37134.3	46.682	795.479
	Lower-bound	37134.3	20	1856.71
Tests of Between-Subjects Effects
Measure: Anesthetic agent
Source	Type III Sum of Squares	df	Mean Square	F	Sig.
Intercept	21272.7	1	21272.7	1006000000000	0
Anesthetic agent	1.291e-08	1	1.291e-08	0.611	0.444
Error	4.23e-07	20	2.115e-08
Pairwise Comparisons
(I) Urethane	(J) Isoflurane	Mean Difference (I-J)	Std. Error	Sig.a	95% Confidence Interval for Differencea
					Lower Bound	Upper Bound
Urethane	Isoflurane	-1.558e-05	0	0.444	-5.718e-05	2.602e-05
Isoflurane	Urethane	1.558e-05	0	0.444	-2.602e-05	5.718e-05
Based on estimated marginal means
a. Adjustment for multiple comparisons: Bonferroni.

## Sheet: 1i
Supplementary file 1i
Effects of anatomical region and region*data type on connectivity patterns – urethane
Source		Type III Sum of Squares	df	Mean Square	F	Sig.
Anatomical region	Sphericity Assumed	4049.25	9	449.916	10.571	0
	Greenhouse-Geisser	4049.25	3.226	1255.05	10.571	0
	Huynh-Feldt	4049.25	3.942	1027.26	10.571	0
	Lower-bound	4049.25	1	4049.25	10.571	0.003
Anatomical region * data type (real or synthetic)	Sphericity Assumed	6193.02	9	688.113	16.168	0
	Greenhouse-Geisser	6193.02	3.226	1919.51	16.168	0
	Huynh-Feldt	6193.02	3.942	1571.12	16.168	0
	Lower-bound	6193.02	1	6193.02	16.168	0
Error(Region)	Sphericity Assumed	9193.03	216	42.56
	Greenhouse-Geisser	9193.03	77.432	118.723
	Huynh-Feldt	9193.03	94.603	97.175
	Lower-bound	9193.03	24	383.043

## Sheet: 1j
Supplementary file 1j
Effects of anatomical region and region*data type on connectivity patterns – isoflurane
Source		Type III Sum of Squares	df	Mean Square	F	Sig.
Anatomical region	Sphericity Assumed	2499.97	9	277.775	7.251	0
	Greenhouse-Geisser	2499.97	2.52	992.123	7.251	0.001
	Huynh-Feldt	2499.97	3.216	777.273	7.251	0
	Lower-bound	2499.97	1	2499.97	7.251	0.016
Anatomical region * data type (real or synthetic)	Sphericity Assumed	3985.93	9	442.882	11.561	0
	Greenhouse-Geisser	3985.93	2.52	1581.83	11.561	0
	Huynh-Feldt	3985.93	3.216	1239.28	11.561	0
	Lower-bound	3985.93	1	3985.93	11.561	0.004
Error(Region)	Sphericity Assumed	5516.6	144	38.31
	Greenhouse-Geisser	5516.6	40.317	136.83
	Huynh-Feldt	5516.6	51.461	107.199
	Lower-bound	5516.6	16	344.787
