# Supplementary figures and images for: Spontaneous neural synchrony links intrinsic spinal sensory and motor networks during unconsciousness
Source: eLife journal article supplement (doi:10.7554/elife.66308), 2021-05-27

Anatomical distribution of significant connections – urethane

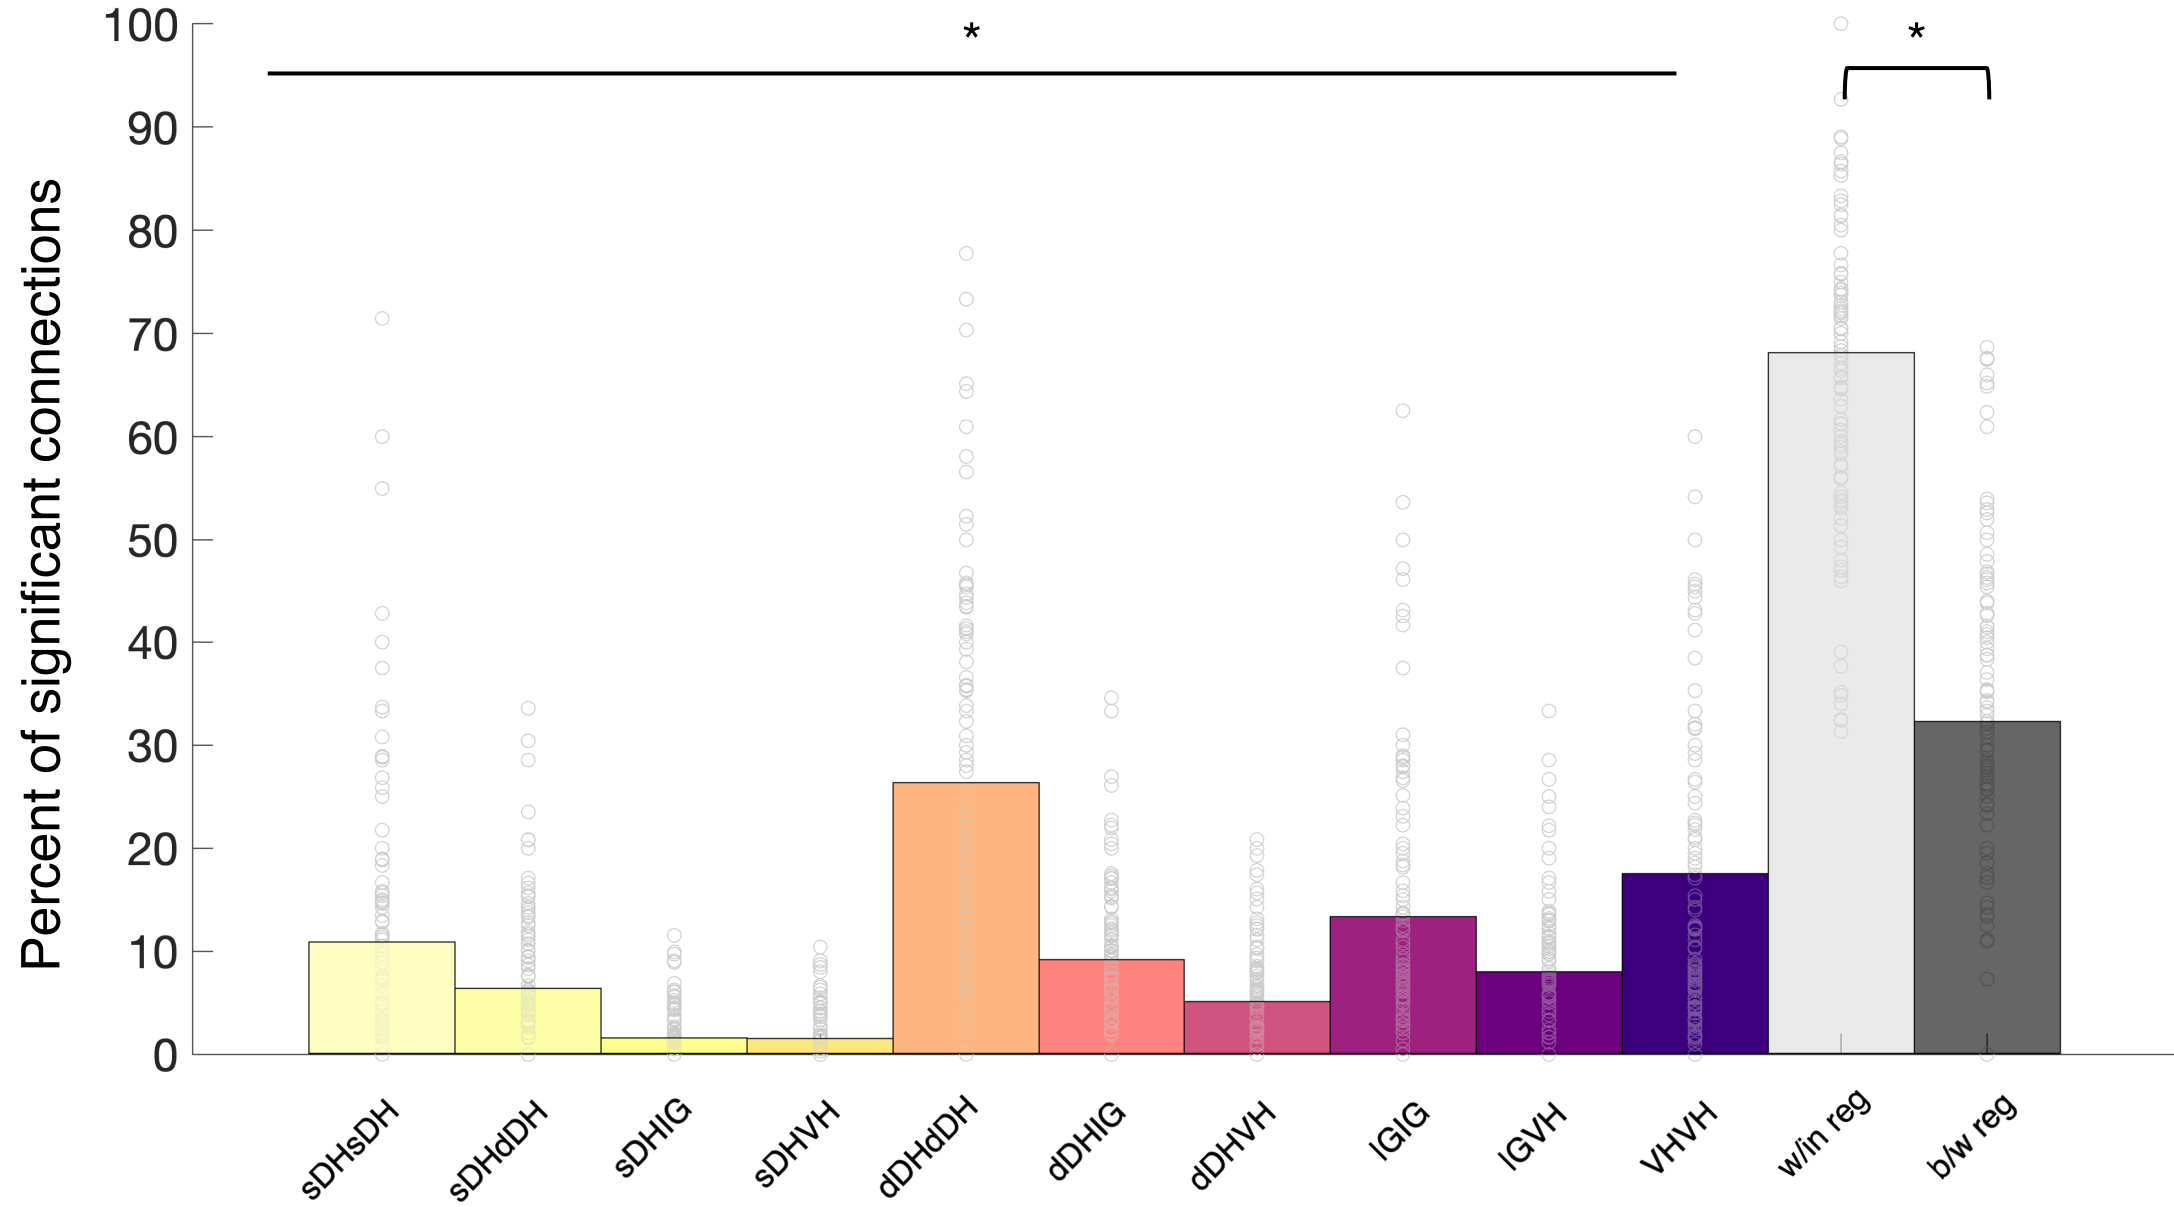

Supplement: supp [file elife-66308-supp-v1.zip]

# Anatomical distribution of significant connections – isoflurane

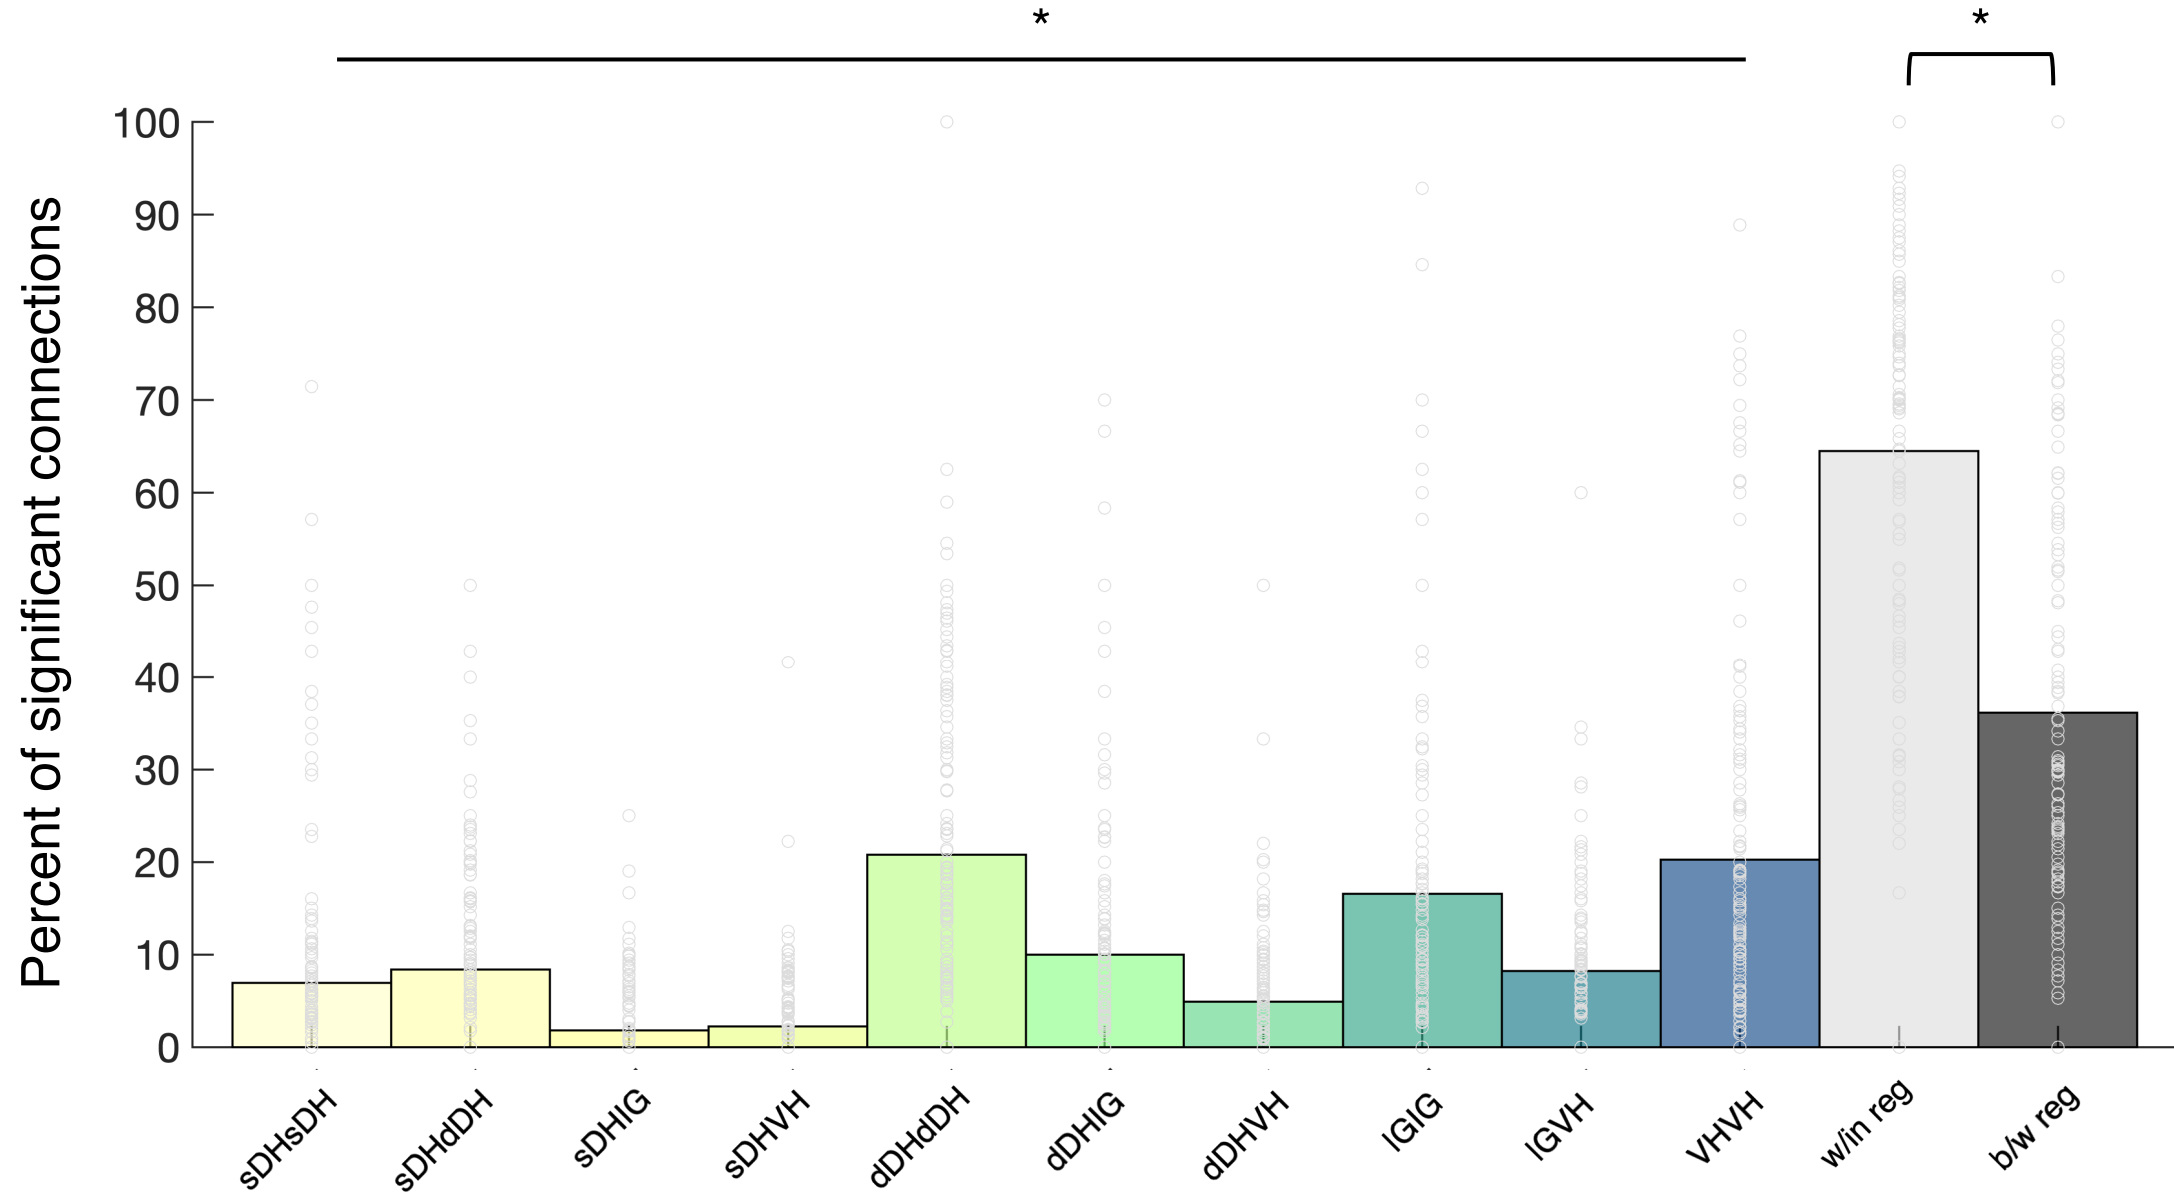

Supplement: supp [file elife-66308-supp-v1.zip]
